# Supplementary material
Source: publisher site journal article supplement (https://www.dovepress.com/article/503672)
Supplement: Supplementary file 1 [file get_supplementary_file.php]

**Supplementary Figures and Tables**


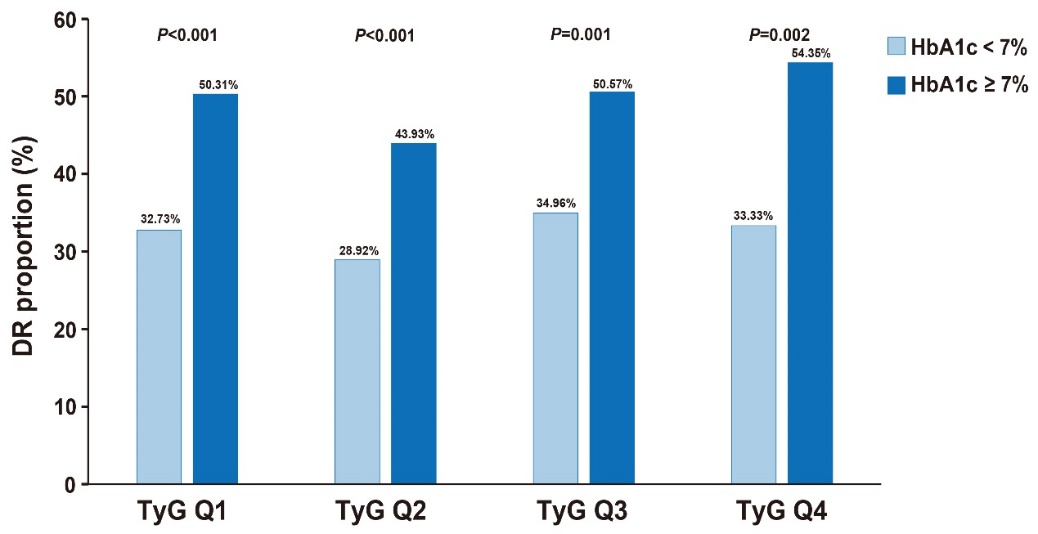


**Figure S1** The proportion of diabetic retinopathy in HbA1c <7% and HbA1 ≥7% groups, stratified by TyG index quartiles.  *P*<0.05 indicated that there was a significant difference in the proportion of DR between HbA1c <7% and HbA1c ≥7% groups. TyG index quartiles: TyG Q1 (TyG <8.67), TyG Q2 (8.67≤TyG<9.13), TyG Q3 (9.13≤TyG<9.63), TyG Q4 (TyG ≥9.63). Abbreviations as in Table 1.


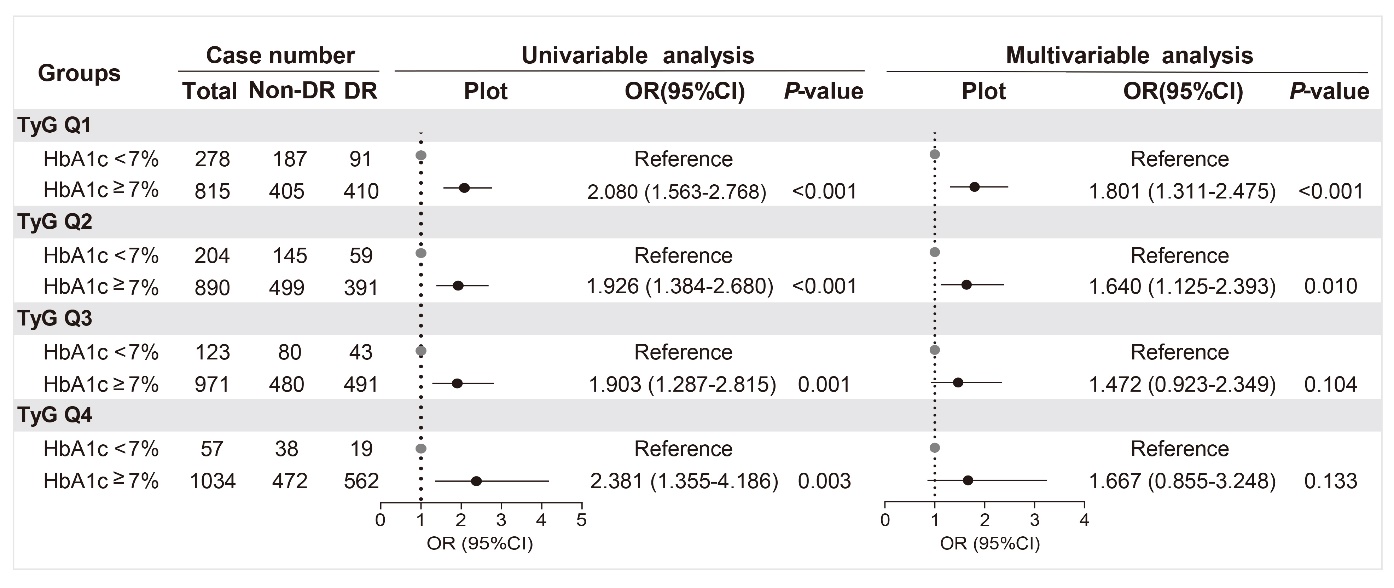


**Figure S2** The risk of diabetic retinopathy in HbA1c <7% and HbA1c ≥7% groups, stratified by TyG index quartiles. Multivariable logistic regression analyses adjusted for for gender, age, T2DM duration, BMI, SBP, DBP, BUN, Cr, ALB, hsCRP, LP(a), TC, HDL-C, LDL-C. TyG index quartiles: TyG Q1 (TyG <8.67), TyG Q2 (8.67≤TyG<9.13), TyG Q3 (9.13≤TyG<9.63), TyG Q4 (TyG ≥9.63). Abbreviations as in Table 1.


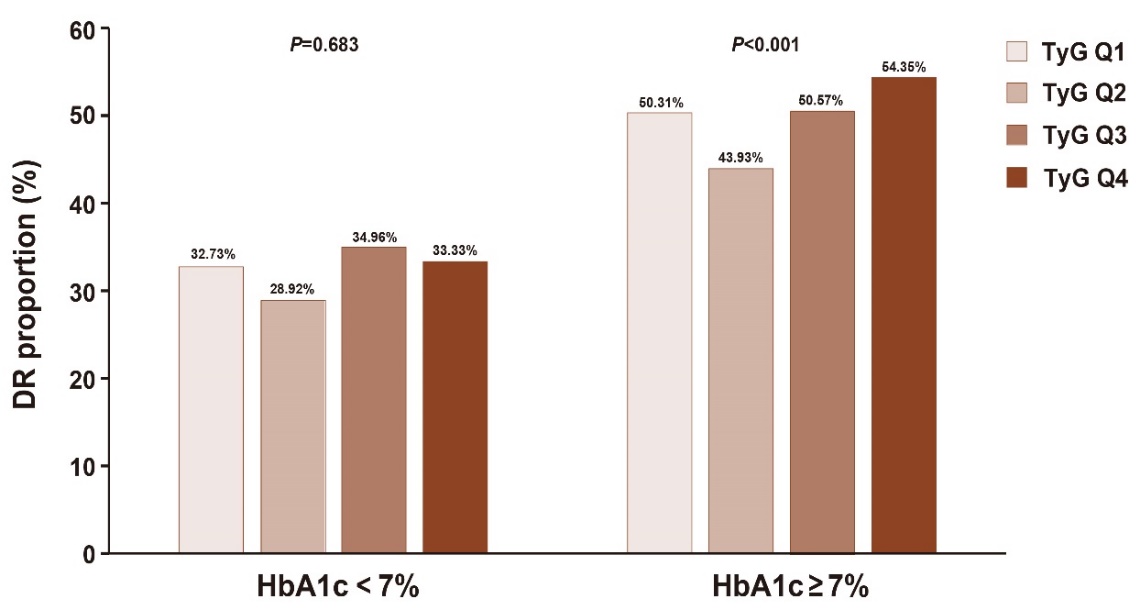


**Figure S3** The proportion of diabetic retinopathy in TyG index quartiles, stratified by HbA1c <7% and HbA1c ≥7%. *P*<0.05 indicated a significant difference in the proportion of DR among TyG index quartiles groups. TyG index quartiles: TyG Q1 (TyG <8.67), TyG Q2 (8.67≤TyG<9.13), TyG Q3 (9.13≤TyG<9.63), TyG Q4 (TyG ≥9.63). Abbreviations as in Table 1.

**Table S1** **Characteristics of included T2DM patients stratified by HbA1c <7% and HbA1c ≥7% groups**

| **Characteristics** | **Glycemic control** | | |
| --- | --- | --- | --- |
| **Controlled glycemia**  **(HbA1c<7%)** | **Uncontrolled glycemia**  **(HbA1c≥7%)** | ***P*-value** |
| Case number | 662 | 3710 |  |
| Gender，N (%) |  |  | 0.325 |
| Male | 391 (15.60%) | 2115 (84.40%) |  |
| Female | 271 (14.52%) | 1595 (85.48%) |  |
| Age（year-old） | 57.93±11.40 | 56.95±12.15 | 0.053 |
| T2DM duration (years) | 10.00(5.00-15.00) | 11.00 (5.00-18.00) | <0.001 |
| BMI (kg/m2) | 25.45±3.67 | 25.88±3.77 | 0.006 |
| SBP (mmHg) | 129.61±16.41 | 131.07±16.80 | 0.039 |
| DBP (mmHg) | 77.10±10.51 | 77.31±10.62 | 0.637 |
| FBG (mmol/L) | 5.98±1.31 | 8.33±2.82 | <0.001 |
| BUN (mmol/L) | 5.34±2.01 | 5.40±1.94 | 0.475 |
| Cr (μmol/L) | 74.67±27.37 | 69.99±25.16 | <0.001 |
| ALB (g/L) | 39.12±3.88 | 38.66±3.84 | 0.004 |
| hsCRP (mg/L) | 0.89(0.40-2.23) | 1.18 (0.50-2.90) | <0.001 |
| LP(a) (mg/dL) | 12.94(6.32-25.68) | 14.73(6.70-29.62) | 0.043 |
| TG (mmol/L) | 1.40(1.02-1.94) | 1.56(1.11-2.31) | <0.001 |
| TC (mmol/L) | 4.20±1.01 | 4.55±1.16 | <0.001 |
| HDL-C (mmol/L) | 1.07±0.34 | 1.05±0.30 | 0.037 |
| LDL-C (mmol/L) | 2.53±0.89 | 2.77±0.94 | <0.001 |
| HbA1c (%) | 6.33±0.46 | 9.46±1.76 | <0.001 |
| TyG index | 8.81±0.60 | 9.25±0.74 | <0.001 |

Notes: The continuous variables were expressed as mean ± standard deviation (SD) or the medians with interquartile ranges (IQRs) after the normality distribution test. Abbreviations as in Table 1.

**Table S2 The multivariable analysis for the relationship between TyG index and DR risk, with and without adjustment for** **T2DM duration as a confounding variable**

| **Parameters** | **Case number** | | |  | **Model A** | |  | **Model B** | |
| --- | --- | --- | --- | --- | --- | --- | --- | --- | --- |
| **Total** | **Non-DR (%)** | **DR (%)** | **OR (95%CI)** | ***P*-value** | **OR (95%CI)** | ***P*-value** |
| **TyG index**  (as continuous variable) | 4372 | 2306 | 2066 |  | 1.175(1.019-1.354) | 0.026 |  | 1.269(1.109-1.451) | 0.001 |
| **TyG index quartiles** |  |  |  |  |  |  |  |  |  |
| TyG Q1 | 1093 | 592(54.16%) | 501(45.84%) |  | Reference |  |  | Reference |  |
| TyG Q2 | 1094 | 644(58.87%) | 450(41.13%) |  | 0.879(0.720-1.072) | 0.203 |  | 0.916(0.760-1.105) | 0.361 |
| TyG Q3 | 1094 | 560(51.19%) | 534(48.81%) |  | 1.091(0.884-1.346) | 0.417 |  | 1.157(0.949-1.410) | 0.149 |
| TyG Q4 | 1091 | 510(46.75%) | 581(53.25%) |  | 1.289(1.008-1.648) | 0.043 |  | 1.449(1.149-1.827) | 0.002 |
| *P* for trend |  |  |  |  | 0.009 |  |  | <0.001 |  |

Notes: OR, odds ratio; CI, confidence intervals.

TyG index quartiles: TyG Q1 (TyG <8.67), TyG Q2 (8.67≤TyG<9.13), TyG Q3 (9.13≤TyG<9.63), TyG Q4 (TyG ≥9.63).

Model A adjustment for gender, age, T2DM duration, BMI, SBP, DBP, BUN, Cr, ALB, hsCRP, LP(a), TC, HDL-C, LDL-C, and HbA1c.

Model B adjustment for gender, age, BMI, SBP, DBP, BUN, Cr, ALB, hsCRP, LP(a), TC, HDL-C, LDL-C, and HbA1c. Abbreviations as in Table 1.

**Table S3 The logistic regression analysis for the risk of diabetic retinopathy according to glycemic control and TyG index quartiles**

| **Groups** | **Case number** | | |  | **Multivariable analysis**  **(TyG Q1 as reference)** | |  | **Multivariable analysis**  **(TyG Q2 as reference)** | |
| --- | --- | --- | --- | --- | --- | --- | --- | --- | --- |
| **Total** | **Non-DR (%)** | **DR (%)** | **OR (95%CI)** | ***P*-value** | **OR (95%CI)** | ***P*-value** |
| **HbA1c<7%** |  |  |  |  |  |  |  |  |  |
| TyG Q1 | 278 | 187(67.27%) | 91(32.73%) |  | Reference |  |  |  |  |
| TyG Q2 | 204 | 145(71.08%) | 59(28.92%) |  | 1.033(0.642-1.663) | 0.893 |  | Reference |  |
| TyG Q3 | 123 | 80(65.04%) | 43(34.96%) |  | 1.493(0.801-2.783) | 0.208 |  | 1.370(0.752-2.497) | 0.304 |
| TyG Q4 | 57 | 38(66.67%) | 19(33.33%) |  | 1.960(0.699-5.494) | 0.200 |  | 1.927(0.689-5.391) | 0.211 |
| *P* for trend |  |  |  |  | 0.464 |  |  | 0.402 |  |
| **HbA1c**≥**7%** |  |  |  |  |  |  |  |  |  |
| TyG Q1 | 815 | 405(49.69%) | 410(50.31%) |  | Reference |  |  |  |  |
| TyG Q2 | 890 | 499(56.07%) | 391(43.93%) |  | 0.875(0.701-1.092) | 0.236 |  | Reference |  |
| TyG Q3 | 971 | 480(49.43%) | 491(50.57%) |  | 1.086(0.865-1.363) | 0.478 |  | 1.260(1.015-1.564) | 0.036 |
| TyG Q4 | 1034 | 472(45.65%) | 562(54.35%) |  | 1.344(1.039-1.738) | 0.024 |  | 1.570(1.232-1.999) | <0.001 |
| *P* for trend |  |  |  |  | 0.005 |  |  | 0.001 |  |

Note: OR, odds ratio; CI, confidence intervals. OR with 95%CI was estimated by multivariable logistic regression analysis adjusted for gender, age, T2DM duration, BMI, SBP, DBP, BUN, Cr, ALB, hsCRP, LP(a), TC, HDL-C, LDL-C. TyG index quartiles: TyG Q1 (TyG <8.67), TyG Q2 (8.67≤TyG<9.13), TyG Q3 (9.13≤TyG<9.63), TyG Q4 (TyG ≥9.63). Abbreviations as in Tables 1.
